# Supplementary material for: Cardiac and behavioural responses to hypoxia and warming in free-swimming gilthead seabream, Sparus aurata
Source: Oxford University Press journal article supplement (doi:10.1242/jeb.242397), 2021-06-30
Supplement: jeb242397supp.pdf [file jeb242397supp.pdf]

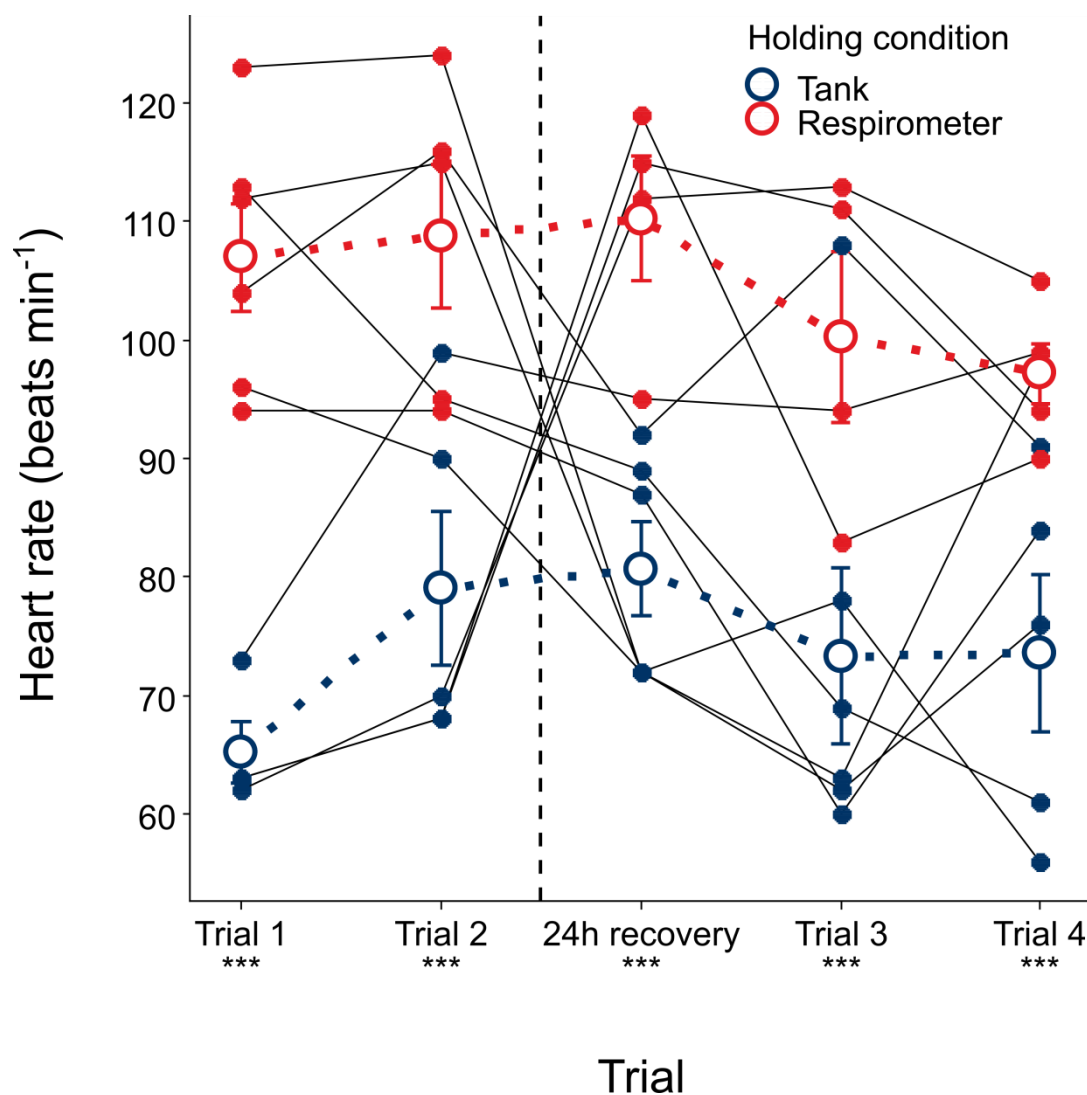

**Figure S1.** Undisturbed  $f_H$  of *S. aurata* in the morning at 07:00 during the five-day exposure protocol, when either in a tank (blue) or respirometer (red). The dashed line represents the moment when fish were exchanged from one holding condition to the other. Each black line corresponds to one fish. The bigger dots, linked by dashed lines, represent the mean  $\pm$  SE values for each holding condition. Asterisks under x-axis denote significant differences between the tank and the respirometers on that day ( $p < 0.001$ ). The experimental sequences that each fish followed are displayed in Tab S1.

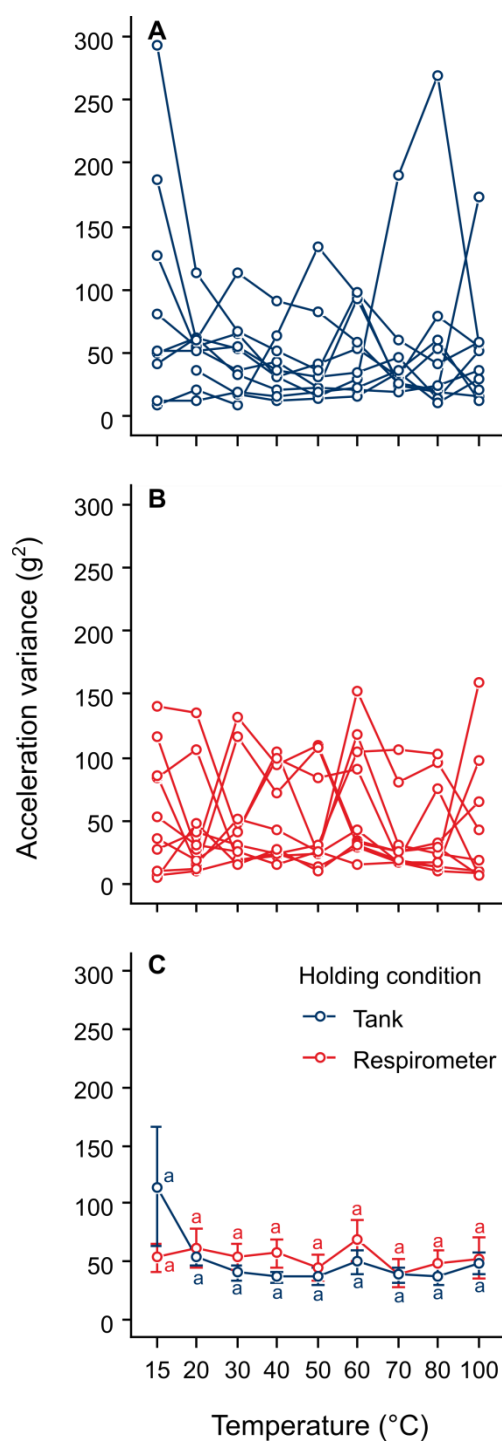

**Figure S2.** The effect of progressive hypoxia on  $VAR_m$  of *S. aurata* (n = 10) showing individual responses when in a tank (A) or box (B), and the mean ( $\pm$  SD) response in both holding conditions (C). In (C) a common superscript indicates no significant difference in the mean (please see text for details of statistical tests used).

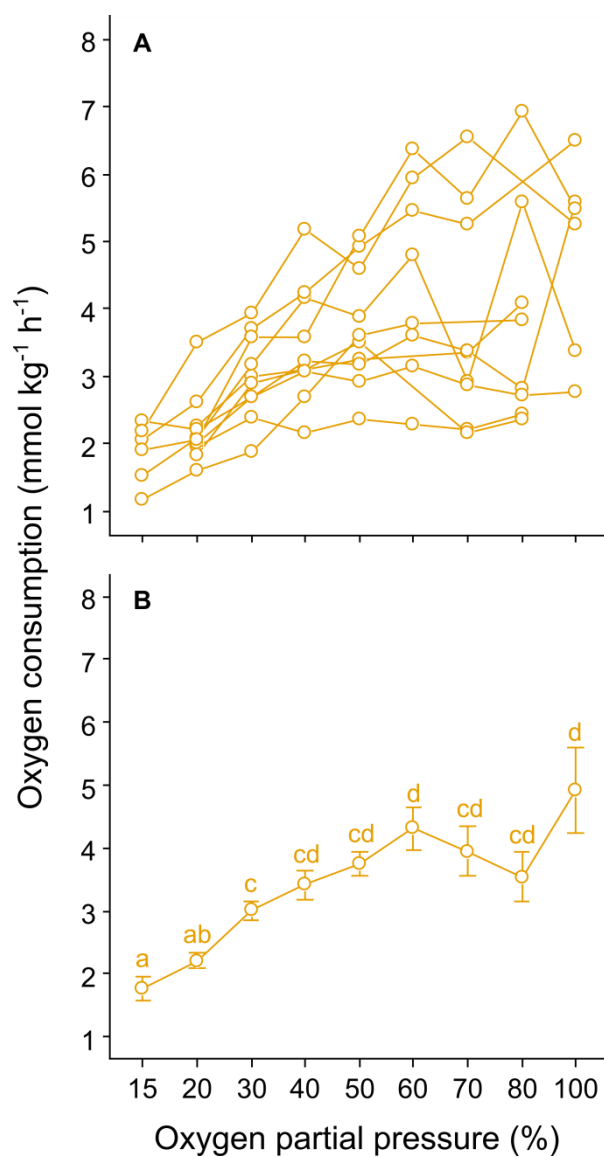

**Figure S3.** The effect of progressive hypoxia on oxygen consumption of *S. aurata* (n = 10) showing individual responses (A) and the mean (± SD) response in both holding conditions (B). In (B) a common superscript indicates no significant difference in the mean (please see text for details of statistical tests used).

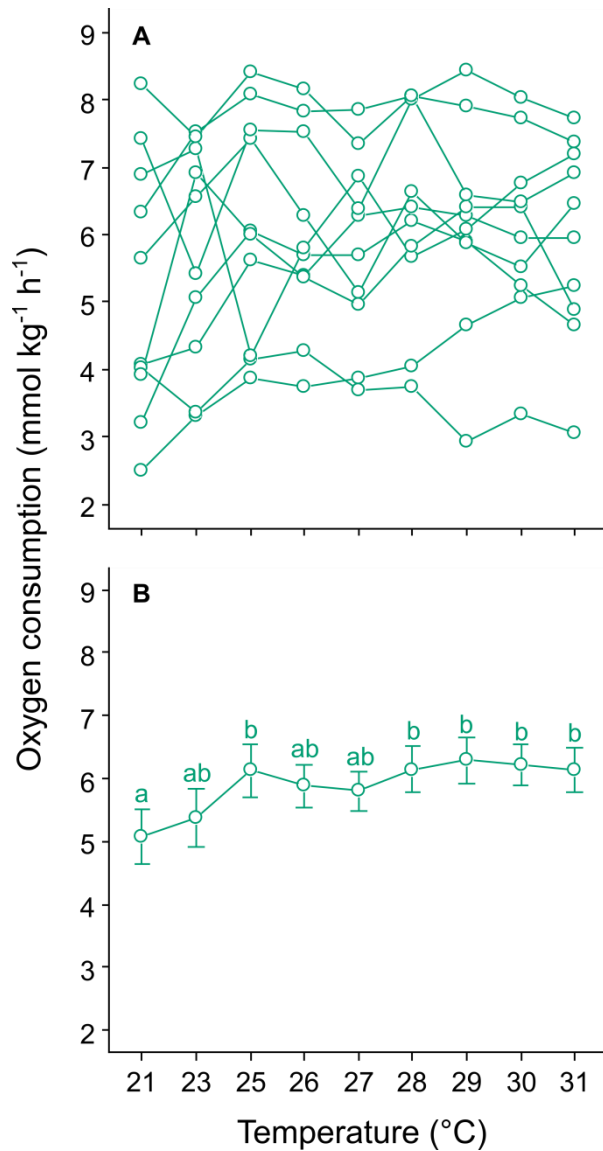

**Figure S4.** The effect of progressive warming on  $\dot{M}O_2$  of *S. aurata*, showing individual responses (A) and the mean ( $\pm$  SD) response in both holding conditions (B). In (B) a common superscript indicates no significant difference in the mean (please see text for details of statistical tests used)

**Table S1.** Sequence of trials for each fish during the five day exposure protocol. W, Warming; H, Hypoxia; T, Tank; R, Respirometer. Trial number refers to the chronological order of the trial.

| Fish number | Trial 1 | Trial 2 | Trial 3 | Trial 4 |
|-------------|---------|---------|---------|---------|
| 1 (480 g)   | W - T   | H - T   | W - R   | H - R   |
| 2 (590 g)   | W - R   | H - R   | W - T   | H - T   |
| 3 (580 g)   | W - R   | H - R   | W - T   | H - T   |
| 4 (801 g)   | W - R   | H - T   | W - T   | H - R   |
| 5 (468 g)   | W - T   | H - T   | H - R   | W - R   |
| 6 (523 g)   | W - R   | H - R   | H - T   | W - T   |
| 7 (527 g)   | W - T   | H - T   | H - R   | W - R   |
| 8 (500 g)   | W - R   | H - R   | H - T   | W - T   |
| 9 (589 g)   | W - R   | H - R   | H - T   | W - T   |
| 10 (509 g)  | W - T   | H - T   | H - R   | W - R   |

**Table S2.** Slope, intercept p-value and  $R^2$  associated to the linear regression between  $\dot{V}O_2$  and  $\dot{V}f_H$  for each fish.

| Fish number | 1         | 2       | 3           | 4       | 5           | 6           | 7      | 8           | 9           | 10          |
|-------------|-----------|---------|-------------|---------|-------------|-------------|--------|-------------|-------------|-------------|
| p_value     | $3e^{-7}$ | 0.00044 | $5.6e^{-5}$ | 0.00019 | $7.8e^{-5}$ | $3.3e^{-9}$ | 0.0004 | $5.6e^{-7}$ | $6.4e^{-5}$ | $5.3e^{-4}$ |
| $R^2$       | 0.84      | 0.63    | 0.73        | 0.68    | 0.61        | 0.92        | 0.58   | 0.91        | 0.64        | 0.51        |
| Slope       | 0.035     | 0.045   | 0.047       | 0.03    | 0.052       | 0.058       | 0.05   | 0.058       | 0.048       | 0.038       |
| Intercept   | 0.67      | -0.94   | -1.4        | 0.48    | -0.14       | -0.098      | -0.68  | -1.27       | -0.77       | 1           |
